# Supplementary material for: Evaluation of Selected Quality Parameters of “Agristigna” Monovarietal Extra Virgin Olive Oil and Its Apple Vinegar-Based Dressing during Storage
Source: MDPI journal article supplement (doi:10.3390/foods11081113), 2022-04-13
Supplement: s1 [file s1]

## Supplementary

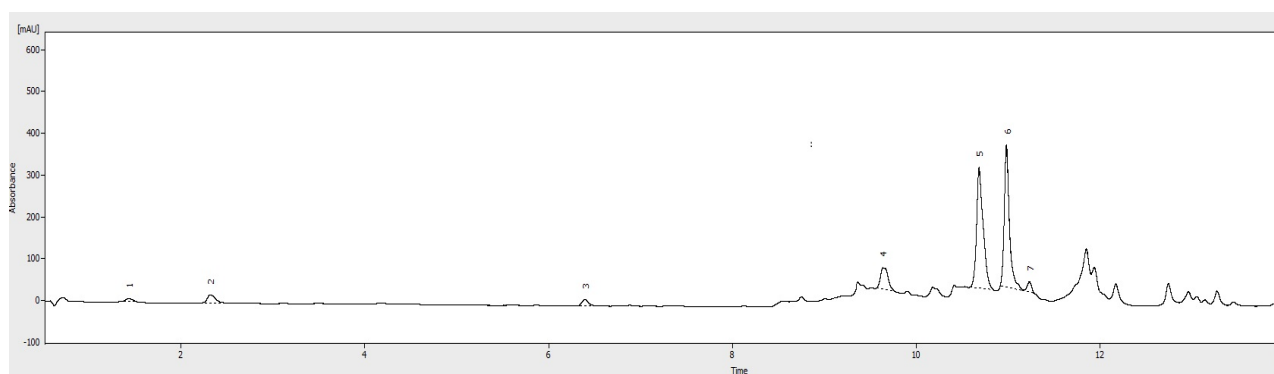

**Figure S1.** UHPLC chromatograms of Agristigna EVOO. Identified compounds: (1) hydroxytyrosol; (2) tyrosol; (3) p-cumaric acid; (4) oleuropein; (5) luteolin; (6) pinoresinol; (7) apigenin.
